# Supplementary material
Source: HighWire-hosted journal article supplement (https://erj.ersjournals.com/content/56/5/2000177)
Supplement: inline-supplementary-material-1 [file inline-supplementary-material-1.pdf]

**Supplementary Table 1. Characteristics and outcomes of biopsied nodules of never-smokers detected at baseline and during follow-up**

|                                                      | <b>Total<br/>(n=139)</b> | <b>Detected at<br/>baseline<br/>(n=104)</b> | <b>Detected<br/>during follow-<br/>up (n=35)</b> | <b>p-value</b> |
|------------------------------------------------------|--------------------------|---------------------------------------------|--------------------------------------------------|----------------|
| Age at diagnosis, mean $\pm$ SD                      | 60.4 $\pm$ 11.9          | 60.1 $\pm$ 11.7                             | 61.3 $\pm$ 12.6                                  | 0.608          |
| Nodule type, n (%)                                   |                          |                                             |                                                  | 0.009          |
| Solid                                                | 51 (36.7)                | 30 (28.8)                                   | 21 (60.0)                                        |                |
| Part-solid                                           | 47 (33.8)                | 41 (39.4)                                   | 6 (17.1)                                         |                |
| Pure GGN                                             | 34 (24.5)                | 27 (26.0)                                   | 7 (20.0)                                         |                |
| Cavitary                                             | 7 (5.0)                  | 6 (5.8)                                     | 1 (2.9)                                          |                |
| Time of planning invasive diagnosis, n (%)           |                          |                                             |                                                  | 0.070          |
| At first detection of relevant nodule                | 65 (46.8)                | 44 (42.3)                                   | 21 (60.0)                                        |                |
| During follow-up                                     | 74 (53.2)                | 60 (57.7)                                   | 14 (40.0)                                        |                |
| Time from detection to biopsy, months, mean $\pm$ SD | 19.8 $\pm$ 30.0          | 19.7 $\pm$ 30.0                             | 20.2 $\pm$ 30.4                                  | 0.922          |
| Nodule size at detection, mm, mean $\pm$ SD          | 15.4 $\pm$ 8.2           | 16.2 $\pm$ 8.3                              | 12.7 $\pm$ 7.7                                   | 0.029          |
| Nodule size at biopsy, mm, mean $\pm$ SD             | 17.5 $\pm$ 8.3           | 18.1 $\pm$ 8.2                              | 15.7 $\pm$ 8.3                                   | 0.146          |
| Type of biopsy, n (%)                                |                          |                                             |                                                  |                |
| Video-assisted thoracic surgery (VATS)               | 89 (64.0)                | 71 (68.3)                                   | 18 (51.4)                                        | 0.073          |
| Percutaneous needle biopsy                           | 38 (27.3)                | 25 (24.0)                                   | 13 (37.1)                                        | 0.132          |
| Bronchoscopic biopsy*                                | 12 (8.6)                 | 8 (7.7)                                     | 4 (11.4)                                         | 0.496          |
| Diagnosed as lung cancer, n (%)                      | 84 (60.4)                | 74 (71.2)                                   | 10 (28.6)                                        | <0.001         |
| Diagnosed as benign (false-positive), n (%)          | 50 (36.0)                | 30 (28.8)                                   | 20 (57.1)                                        | 0.003          |

SD=standard deviation, GGN=ground glass nodule

\*Including EBUS (endobronchial ultrasound) and radial-EBUS guided biopsy

**Supplementary Table 2. Subgroup analyses of main outcomes stratified by age and sex**

| <b>Subgroups</b>                              | <b>Total</b> | <b>Never-smoker</b> | <b>Ever-smoker</b> | <b>p value</b> |
|-----------------------------------------------|--------------|---------------------|--------------------|----------------|
| Age <55 (N=25,730)                            | 25,730       | 11,675              | 14,055             |                |
| Received invasive biopsy, n/N (%)             | 117 (0.5)    | 50 (0.4)            | 67 (0.5)           | 0.565          |
| Diagnosed as lung cancer, n/N (%)             | 65 (0.3)     | 29 (0.2)            | 36 (0.3)           | 0.902          |
| Diagnosed as benign (false-positive), n/N (%) | 52 (0.2)     | 21 (0.2)            | 31 (0.2)           | 0.469          |
| Any procedure-related complication, n/N (%)   | 13 (0.1)     | 4 (0.0)             | 9 (0.1)            | 0.290          |
| Age ≥55 (N=11,706)                            | 11,706       | 6,293               | 5,413              |                |
| Received invasive biopsy, n/N (%)             | 216 (1.8)    | 89 (1.4)            | 127 (2.3)          | <0.001         |
| Diagnosed as lung cancer, n/N (%)             | 142 (1.2)    | 55 (0.9)            | 87 (1.6)           | <0.001         |
| Diagnosed as benign (false-positive), n/N (%) | 67 (0.6)     | 29 (0.5)            | 38 (0.7)           | 0.085          |
| Any procedure-related complication, n/N (%)   | 42 (0.4)     | 16 (0.3)            | 26 (0.5)           | 0.041          |
| Sex: male (N=23,827)                          | 23,827       | 5,644               | 18,183             |                |
| Received invasive biopsy, n/N (%)             | 226 (0.9)    | 42 (0.7)            | 184 (1.0)          | 0.070          |
| Diagnosed as lung cancer, n/N (%)             | 136 (0.6)    | 20 (0.4)            | 116 (0.6)          | 0.013          |
| Diagnosed as benign (false-positive), n/N (%) | 87 (0.4)     | 21 (0.4)            | 66 (0.4)           | 0.921          |
| Any procedure-related complication, n/N (%)   | 42 (0.2)     | 7 (0.1)             | 35 (0.2)           | 0.284          |
| Sex: female (N=13,609)                        | 13,609       | 12,324              | 1,285              |                |
| Received invasive biopsy, n/N (%)             | 107 (0.8)    | 97 (0.8)            | 10 (0.8)           | 0.973          |
| Diagnosed as lung cancer, n/N (%)             | 71 (0.5)     | 64 (0.5)            | 7 (0.5)            | 0.904          |
| Diagnosed as benign (false-positive), n/N (%) | 32 (0.2)     | 29 (0.2)            | 3 (0.2)            | 0.990          |
| Any procedure-related complication, n/N (%)   | 13 (0.1)     | 13 (0.1)            | 0 (0)              | 0.244          |
